# Supplementary material for: QALE analysis of CO dissociative kinetics of Ru(CO)4L (L = P-donor ligands): accelerating effects of hydrogen in PHnR3 − nligands (n = 1–2)
Source: Royal Society of Chemistry journal article supplement (doi:10.1039/b315719a), 2004-01-01
Supplement: b315719a.pdf [file b315719a.pdf]

**Electronic Supplementary Information for:**

**QALE Analysis of CO Dissociative Kinetics of Ru(CO)<sub>4</sub>L (L = P-donor ligands): Accelerating Effects of Hydrogen in PH<sub>n</sub>R<sub>3-n</sub> Ligands (n = 1-2)<sup>†</sup>**

Claudia Babij, Lezhan Chen, Igor O. Koshevoy, and Anthony J. Poë\*

Lash Miller Chemical Laboratories, University of Toronto, 80 St. George Street, Toronto, Canada M5S 3H6. E-mail: apoe@chem.utoronto.ca

**Table S1.** Rate data for the reaction of Ru(CO)<sub>4</sub>L With L or L' <sup>a</sup> in heptane

| L                                 | T, °C | 10 <sup>2</sup> [L']/M | 10 <sup>4</sup> k <sub>obs</sub> /s <sup>-1</sup> |                |                |                |
|-----------------------------------|-------|------------------------|---------------------------------------------------|----------------|----------------|----------------|
|                                   |       |                        | v <sub>1</sub>                                    | v <sub>2</sub> | v <sub>3</sub> | v <sub>4</sub> |
| PMe <sub>3</sub>                  | 50.0  | 2.50                   | 0.375                                             | 0.382          |                |                |
|                                   |       | 5.00                   | 0.380                                             | 0.356          |                |                |
|                                   |       | 7.50                   | 0.389                                             | 0.398          |                |                |
|                                   | 60.0  | 2.50                   | 1.68                                              | 1.72           |                |                |
|                                   |       | 4.50                   | 1.67                                              | 1.73           |                |                |
|                                   |       | 5.00                   | 1.67                                              | 1.73           |                |                |
|                                   | 70.0  | 3.00                   | 6.68                                              | 6.95           |                |                |
|                                   |       | 5.00                   | 6.93                                              | 7.09           |                |                |
|                                   |       | 7.50                   | 6.96                                              | 7.09           |                |                |
| P(NMe <sub>2</sub> ) <sub>3</sub> | 50.0  | 3.30                   | 1.15                                              | 1.17           |                |                |
|                                   |       | 5.50                   | 1.15                                              | 1.20           |                |                |
|                                   |       | 8.25                   | 1.15                                              | 1.15           |                |                |
|                                   | 60.0  | 2.72                   | 4.72                                              | 4.68           | 4.93           | 4.99           |
|                                   |       | 9.79                   | 4.78                                              | 4.85           | 4.83           | 4.17           |
|                                   |       | 15.0                   | 5.10                                              | 5.15           | 4.97           | 4.81           |
|                                   | 70.0  | 3.30                   | 18.67                                             | 18.53          |                |                |
|                                   |       | 5.50                   | 18.78                                             | 18.98          |                |                |
|                                   |       | 8.25                   | 18.75                                             | 18.97          |                |                |
| PH <sub>2</sub> Ph <sup>b</sup>   | 50.2  | 1.16                   | 2.30                                              | 2.73           | 2.50           |                |
|                                   |       | 2.03                   | 2.39                                              | 2.63           | 2.49           |                |
|                                   |       | 2.90                   | 2.26                                              | 2.92           | 2.54           |                |
|                                   | 60.0  | 1.00                   | 11.4                                              | 12.2           | 11.4           |                |
|                                   |       | 4.34                   | 10.4                                              | 12.4           | 11             |                |
|                                   |       | 4.96                   | 9.79                                              | 11.1           | 10.4           |                |
|                                   | 70.0  | 4.67                   | 15.31                                             | 16.11          | 15.98          | 15.13          |
|                                   |       | 5.2                    | 14.66                                             | 14.14          | 14.04          |                |
|                                   |       | 5.2                    | 14.66                                             | 14.14          | 14.04          |                |
| PHPh <sub>2</sub> <sup>b</sup>    | 60.0  | 1.24                   | 9.01                                              | 10.5           | 10.8           |                |
|                                   |       | 3.91                   | 8.88                                              | 8.76           | 11.1           |                |
|                                   |       | 4.56                   | 7.45                                              | 6.88           | 9.02           |                |

|                                 |      |       |      |      |      |      |
|---------------------------------|------|-------|------|------|------|------|
|                                 |      | 5.14  | 9.38 | 8.32 | 8.38 |      |
|                                 |      | 8.65  | 8.9  | 9.33 | 6.81 |      |
|                                 |      | 5.83  | 5.99 | 6.4  | 5.97 |      |
| PH <sub>2</sub> Cy              | 60.0 | 1.68  | 12.9 | 13.7 |      |      |
|                                 |      | 4.19  | 9.69 | 10.2 |      |      |
|                                 |      | 6.71  | 11.6 | 9.97 |      |      |
| PHCy <sub>2</sub>               | 60.0 | 1.45  | 15   | 15.2 |      |      |
|                                 |      | 6.53  | 15.4 | 16.5 |      |      |
|                                 |      | 9.07  | 17.7 | 17.8 |      |      |
| PD <sub>2</sub> Ph <sup>b</sup> | 60.0 | 8.76  | 8.37 | 8.07 | 8.56 | 8.2  |
|                                 |      | 29.19 | 8.62 | 8.58 | 9.14 | 8.59 |
| PDPPh <sub>2</sub>              | 60.0 | 4     | 4.89 | 4.8  | 5.27 | 5.08 |
|                                 |      | 8.01  | 4.76 | 4.51 | 5.23 | 5.05 |

<sup>a</sup> L = L' unless otherwise indicated. <sup>b</sup> L = P(OEt)<sub>3</sub>.

---
